# Supplementary material
Source: PubMed Central journal article supplement (PMC9802546)
Supplement: KID.0001562022-s0001.pdf [file KID.0001562022-s0001.pdf]

**Supplemental Table 1.** Comparison of trial design for AMETHYST-DN, OPAL-HK, and TOURMALINE

|                                | <b>AMETHYST-DN</b> <sup>18, 20</sup>                                                                                                                                                                                                                                                                                       | <b>OPAL-HK</b> <sup>19</sup>                                                                                                                                                                                                                                                                   | <b>TOURMALINE</b>                                                                                                                                                                                                              |
|--------------------------------|----------------------------------------------------------------------------------------------------------------------------------------------------------------------------------------------------------------------------------------------------------------------------------------------------------------------------|------------------------------------------------------------------------------------------------------------------------------------------------------------------------------------------------------------------------------------------------------------------------------------------------|--------------------------------------------------------------------------------------------------------------------------------------------------------------------------------------------------------------------------------|
| <b>Design</b>                  | 52-week, phase 2, open-label, randomized study. The study had a run-in period of up to 4 weeks, an 8-week treatment phase followed by a long-term maintenance phase of up to 44 weeks                                                                                                                                      | 12-week, phase 3, two-phase, single-blind, randomized withdrawal study. After the initial 4-week treatment phase, eligible patients entered a randomized withdrawal phase, and continued patiromer treatment or were switched to placebo for 8 weeks.                                          | 4-week, phase 4, open-label, randomized trial that evaluated patiromer administered without food versus with food                                                                                                              |
| <b>Patients</b>                | Adults with T2DM, CKD and hyperkalemia who were receiving RAASi                                                                                                                                                                                                                                                            | Patients with CKD and hyperkalemia who were receiving RAASi                                                                                                                                                                                                                                    | Patients with hyperkalemia.                                                                                                                                                                                                    |
| <b>Patiromer dose</b>          | Patients with mild hyperkalemia (serum potassium >5.0–5.5 mEq/L) received patiromer at 8.4 g to 25.2 g/day, while those with moderate hyperkalemia (>5.5–<6.0 mEq/L) received 16.8 g to 33.6 g/day. Patiromer was titrated during the treatment period to reach and maintain serum potassium ≤5.0 mEq/L.                   | Patients with mild hyperkalemia (serum potassium 5.1–<5.5 mEq/L) received patiromer at 8.4 g, while those with moderate-to-severe hyperkalemia (≥5.5–<6.5 mEq/L) received 18.6 g/day. Patiromer was titrated to achieve and maintain serum potassium within the target range (3.8–<5.1 mEq/L). | Patiromer was administered at a starting dose of 8.4 g/day and titrated in increments of 8.4 g/day (to a maximum of 25.2 g/day) to reach and maintain serum potassium levels in the target range of 3.8–5.0 mEq/L.             |
| <b>Main Inclusion criteria</b> | <ol style="list-style-type: none"> <li>1. Age 30 - 80 years old at screening</li> <li>2. T2DM diagnosed after age 30 which has been treated with oral medications or insulin for at least 1 year</li> <li>3. CKD: eGFR 15 - &lt;60 mL/min/1.73m<sup>2</sup></li> <li>4. uACR: (Cohorts 1 and 2 only): ≥ 30 mg/g</li> </ol> | <ol style="list-style-type: none"> <li>1. Males and females ages 18 - 80</li> <li>2. CKD - eGFR 15 to &lt;60 mL/min/1.73m<sup>2</sup></li> <li>3. Serum K<sup>+</sup> 5.1 to &lt;6.5 mEq/L</li> <li>4. Receiving an ACE Inhibitor, an ARB, or an AA medication</li> </ol>                      | <ol style="list-style-type: none"> <li>5. Potassium concentration &gt;5.0 mEq/L</li> <li>6. Stable RAASi medication, if taking</li> <li>7. Medications taken on a chronic basis are given once daily or twice daily</li> </ol> |

- 
- 5. Serum K<sup>+</sup> values:  
Cohorts 1 and 2: 4.3 - 5.0 mEq/L at screening AND 4.5 - 5.0 mEq/L at randomisation AND >5.0 - <6.0 mEq/L at randomization to patiromer; Cohort 3: >5.0 - <6.0 mEq/L
  - 6. Receiving an ACEI and/or ARB for at least 28 days prior to screening
  - 7. SBP ≥130 - <180 mmHg AND average DBP ≥80 - <110 mmHg
- 

|                                |                                                                                                                                                                 |                                                                              |                                                             |
|--------------------------------|-----------------------------------------------------------------------------------------------------------------------------------------------------------------|------------------------------------------------------------------------------|-------------------------------------------------------------|
| <b>Main Exclusion criteria</b> | 1. Type 1 diabetes mellitus                                                                                                                                     | 1. Auto-immune related CKD                                                   | 1. Expected need for dialysis                               |
|                                | 2. HbA1C >12% (Cohort 1 and 2)                                                                                                                                  | 2. Uncontrolled Type 1 diabetes or HbA1c >10.0%                              | 2. Major organ transplant                                   |
|                                | 3. Emergency treatment for T2DM within the last 3 months                                                                                                        | 3. NYHA class IV heart failure                                               | 3. History of conditions associated with pseudohyperkalemia |
|                                | 4. SBP >180 mmHg or DBP >110 mmHg                                                                                                                               | 4. Major surgery or heart or kidney transplant in the past 3 months          | 4. History of gastrointestinal disorders                    |
|                                | 5. serum magnesium <1.4 mg/dL (<0.58 mmol/L)                                                                                                                    | 5. Significant cardiovascular or cerebrovascular events in the past 2 months | 5. Cancer or unstable medical condition                     |
|                                | 6. uACR ≥10000 mg/g (Cohort 1 and 2)                                                                                                                            | 6. BMI ≥ 40 kg/m <sup>2</sup>                                                |                                                             |
|                                | 7. Renal artery stenosis, diabetic gastroparesis, non-diabetic CKD                                                                                              |                                                                              |                                                             |
|                                | 8. History of gastrointestinal disorders                                                                                                                        |                                                                              |                                                             |
|                                | 9. NYHA Class III or IV heart failure                                                                                                                           |                                                                              |                                                             |
|                                | 10. BMI ≥40 kg/m <sup>2</sup>                                                                                                                                   |                                                                              |                                                             |
|                                | 11. Unstable angina, unresolved acute coronary syndrome, cardiac arrest or clinically significant ventricular arrhythmias, TIA or stroke, IV cardiac medication |                                                                              |                                                             |

---

---

12. Kidney transplant, cancer, alcoholism, or drug/chemical abuse, raised liver enzymes

13. New or changed prescriptions for loop and thiazide diuretics or other antihypertensive medications

14. Use of polymer-based drugs, phosphate binders, other potassium binders, lithium, potassium sparing medications, potassium supplements, bicarbonate or baking soda

---

AA: aldosterone antagonist; ACE: angiotensin-converting enzyme; ARB: angiotensin II receptor blocker; BMI: body mass index; CKD: chronic kidney disease; DBP: diastolic blood pressure; eGFR: estimated glomerular filtration; HbA1c: haemoglobin A1c; K<sup>+</sup>: potassium; NYHA: New York Heart Association; RAASi: renin angiotensin aldosterone system inhibitors; SBP: systolic blood pressure; T2DM: Type 2 diabetes mellitus; uACR: urine albumin creatinine ratio.

**Supplemental Table 2.** Non-fatal treatment-emergent adverse events leading to treatment discontinuation, with onset during the first four weeks, by System Organ Class and Preferred Term

| Adverse event                                                       | n (%) of patients         |                           |
|---------------------------------------------------------------------|---------------------------|---------------------------|
|                                                                     | Patients with             | Patients with             |
|                                                                     | Stage 3b–5 CKD<br>(n=421) | Stage 1–3a CKD<br>(n=211) |
| <b>≥ 1 AE leading to discontinuation of patiromer<sup>a,b</sup></b> | 24 (6)                    | 5 (2)                     |
| <b>Renal and urinary disorders</b>                                  |                           |                           |
| Worsening renal function                                            | 5 (1)                     | 0                         |
| Acute kidney injury                                                 | 1 (0.2)                   | 0                         |
| <b>Gastrointestinal disorders</b>                                   |                           |                           |
| Vomiting                                                            | 3 (0.7)                   | 0                         |
| Diarrhea                                                            | 2 (0.5)                   | 1 (0.5)                   |
| Constipation                                                        | 2 (0.5)                   | 0                         |
| Flatulence                                                          | 2 (0.5)                   | 0                         |
| Nausea                                                              | 1 (0.2)                   | 0                         |
| Abdominal pain                                                      | 1 (0.2)                   | 0                         |
| Abdominal distension                                                | 0                         | 1 (0.5)                   |

|                                                             |         |         |
|-------------------------------------------------------------|---------|---------|
| Abdominal pain upper                                        | 0       | 1 (0.5) |
| <b>Cardiac disorders</b>                                    |         |         |
| Angina pectoris                                             | 1 (0.2) | 0       |
| Atrial fibrillation                                         | 0       | 1 (0.5) |
| <b>General disorders and administration site conditions</b> |         |         |
| Fatigue                                                     | 1 (0.2) | 0       |
| <b>Vascular disorders</b>                                   |         |         |
| Hypertensive crisis                                         | 1 (0.2) | 0       |
| <b>Metabolism and Nutrition Disorders</b>                   |         |         |
| Hypokalemia                                                 | 2 (0.5) | 0       |
| Anorexia                                                    | 1 (0.2) | 0       |
| <b>Infections and infestations</b>                          |         |         |
| Urinary tract infection                                     | 1 (0.2) | 0       |
| <b>Musculoskeletal and connective tissue disorders</b>      |         |         |
| Muscle spasms                                               | 1 (0.2) | 0       |
| <b>Immune system disorders</b>                              |         |         |
| Hypersensitivity                                            | 0       | 1 (0.5) |
| <b>Investigations</b>                                       |         |         |
| Glomerular filtration rate decreased                        | 2 (0.5) | 0       |

<sup>a</sup>Some patients may have discontinued patiromer due to >1 adverse event.

<sup>b</sup>In 9 patients, these events were adjudicated by the investigator to be treatment-related: abdominal pain (one patient), constipation (two patients), diarrhea (two patients),

flatulence (two patients), vomiting (two patients); none of these events were serious or severe.

AE, adverse event; CKD, chronic kidney disease.

**Supplemental Table 3:** Serious treatment-emergent adverse events with onset during the first four weeks, by System Organ Class and Preferred Term

| No. of patients (%)                         | Patients with<br>CKD stage 3b–5<br>(n=421) | Patients with<br>CKD stage 1–3a<br>(n=211) |
|---------------------------------------------|--------------------------------------------|--------------------------------------------|
| <b>≥1 serious adverse event<sup>a</sup></b> | <b>16 (4)</b>                              | <b>3 (1)</b>                               |
| <b>Cardiac disorders</b>                    | <b>4 (1.0)</b>                             | <b>1 (0.5)</b>                             |
| Atrial fibrillation                         | 1 (0.2)                                    | 1 (0.5)                                    |
| Angina pectoris                             | 1 (0.2)                                    | 0                                          |
| Cardiorespiratory arrest <sup>b</sup>       | 1 (0.2)                                    | 0                                          |
| Myocardial infarction <sup>b</sup>          | 1 (0.2)                                    | 0                                          |
| <b>Renal and urinary disorders</b>          | <b>5 (1)</b>                               | <b>(0)</b>                                 |
| Worsening renal function                    | 4 (1)                                      | 0                                          |
| Acute kidney injury                         | 1 (0.2)                                    | 0                                          |
| <b>Infections and infestations</b>          | <b>2 (0.5)</b>                             | <b>1 (0.5)</b>                             |
| Arteriosclerotic gangrene                   | 0                                          | 1 (0.5)                                    |
| Escherichia bacteremia                      | 1 (0.2)                                    | 0                                          |
| Gastrointestinal infection                  | 1 (0.2)                                    | 0                                          |
| Urinary tract infection                     | 1 (0.2)                                    | 0                                          |
| <b>Vascular disorders</b>                   | <b>2 (0.5)</b>                             | <b>1 (0.5)</b>                             |
| Diabetic vascular disorder <sup>b</sup>     | 0                                          | 1 (0.5)                                    |
| Hypertensive crisis                         | 1 (0.2)                                    | 0                                          |

|                                                             |                |          |
|-------------------------------------------------------------|----------------|----------|
| Intermittent claudication                                   | 1 (0.2)        | 0        |
| <b>Blood and lymphatic system disorders</b>                 | <b>1 (0.2)</b> | <b>0</b> |
| Anemia                                                      | 1 (0.2)        | 0        |
| <b>Gastrointestinal disorders</b>                           | <b>1 (0.2)</b> | <b>0</b> |
| Mesenteric artery thrombosis <sup>b</sup>                   | 1 (0.2)        | 0        |
| <b>General disorders and administration site conditions</b> | <b>1 (0.2)</b> | <b>0</b> |
| Sudden cardiac death <sup>b</sup>                           | 1 (0.2)        | 0        |
| <b>Investigations</b>                                       | <b>1 (0.2)</b> | <b>0</b> |
| Anticoagulation drug level below therapeutic level          | 1 (0.2)        | 0        |
| <b>Metabolism and nutrition disorders</b>                   | <b>1 (0.2)</b> | <b>0</b> |
| Gout                                                        | 1 (0.2)        | 0        |

<sup>a</sup> No serious adverse events were considered related to treatment with patiromer.

<sup>b</sup> Adverse event led to death.

CKD, chronic kidney disease.



**Supplemental Table 4.** Mean (SD) serum calcium, phosphate and magnesium at baseline, Week 4 and change from baseline to Week 4 (safety population; N=632)

|                                               | <b>Patients with<br/>Stage 3b–5 CKD<br/>(n=421)</b> | <b>Patients with<br/>Stage 1–3a CKD<br/>(n=211)</b> |
|-----------------------------------------------|-----------------------------------------------------|-----------------------------------------------------|
| <b>Mean (SD) serum Ca<sup>2+</sup>, mg/dL</b> |                                                     |                                                     |
| Baseline <sup>a</sup>                         | 9.21 (0.65)                                         | 9.51 (0.51)                                         |
| Week 4 <sup>a</sup>                           | 9.23 (0.63)                                         | 9.55 (0.50)                                         |
| Change from baseline to Week 4                | -0.005 (0.55)                                       | +0.043 (0.50)                                       |
| <b>Mean (SD) serum Mg<sup>2+</sup>, mg/dL</b> |                                                     |                                                     |
| Baseline <sup>a</sup>                         | 2.14 (0.31)                                         | 2.0 (0.24)                                          |
| Week 4 <sup>a</sup>                           | 1.95 (0.27)                                         | 1.88 (0.27)                                         |
| Change from baseline to Week 4                | -0.19 (0.28)                                        | -0.12 (0.21)                                        |
| <b>Mean (SD) phosphate, mg/dL</b>             |                                                     |                                                     |
| Baseline <sup>a</sup>                         | 3.97 (0.73)                                         | 3.58 (0.60)                                         |
| Week 4 <sup>a</sup>                           | 3.76 (0.87)                                         | 3.48 (0.66)                                         |
| Change from baseline to Week 4                | -0.19 (0.80)                                        | -0.11 (0.74)                                        |

<sup>a</sup>Not all patients had baseline or post-baseline measurements available.

Ca<sup>2+</sup>, calcium; CKD, chronic kidney disease; Mg<sup>2+</sup>, magnesium; SD, standard deviation.

**Supplemental Table 5.** Mean (SD) eGFR and spot urine ACR at baseline, Week 4 and change from baseline to Week 4 (safety population; N=632)

|                                                 | <b>Patients with<br/>Stage 3b–5 CKD<br/>(n=421)</b> | <b>Patients with<br/>Stage 1–3a CKD<br/>(n=211)</b> |
|-------------------------------------------------|-----------------------------------------------------|-----------------------------------------------------|
| <b>Mean (SD) eGFR, mL/min/1.73m<sup>2</sup></b> |                                                     |                                                     |
| Baseline <sup>a</sup>                           | 27.9 (8.9)                                          | 58.1 (12.7)                                         |
| Week 4 <sup>a</sup>                             | 31.0 (13.4)                                         | 59.4 (16.2)                                         |
| Change from baseline to Week 4                  | +2.6 (10.0)                                         | +0.9 (13.6)                                         |
| <b>Mean (SD) spot urine ACR (mg/g)</b>          |                                                     |                                                     |
| Baseline <sup>a</sup>                           | 1249.9 (1913.4)                                     | 599.8 (1235.9)                                      |
| Week 4 <sup>a</sup>                             | 887.9 (1416.9)                                      | 634.9 (1375.1)                                      |
| Change from baseline to Week 4                  | -213.6 (1118.65)                                    | +4.4 (905.08)                                       |

<sup>a</sup>Not all patients had baseline or post-baseline measurements available.

ACR, albumin–creatinine ratio; CKD, chronic kidney disease; eGFR, estimated glomerular filtration rate; SD, standard deviation.
